# Supplementary material for: Low-Frequency and Rare-Coding Variation Contributes to Multiple Sclerosis Risk
Source: PubMed Central journal article supplement (PMC6269166; doi:10.1016/j.cell.2018.09.049), 2018-11-29
Supplement: mmc1.pdf [file mmc1.pdf]

**Cell, Volume 175**

**Supplemental Information**

**Low-Frequency and Rare-Coding Variation**

**Contributes to Multiple Sclerosis Risk**

**International Multiple Sclerosis Genetics Consortium**

**SUPPLEMENTAL TABLES AND LEGENDS**

| Stratum               | Chip version | Cohort   | Pre-QC samples | Post-QC samples | Case/Con             | Male/Female   | Polymorphic variants | Rare variants (MAF < 5%) |
|-----------------------|--------------|----------|----------------|-----------------|----------------------|---------------|----------------------|--------------------------|
| Belgium               | Exome_v1.0   | BEL      | 397            | 386             | 386/0/0              | 123/263/0     | 78,044               | 52,806                   |
|                       | Exome_v1.1   | BEL      | 499            | 356             | 0/356/0              | 168/188/0     | 78,044               | 52,806                   |
| Denmark               | Exome_v1.0   | DEN      | 552            | 487             | 302/185/0            | 175/312/0     | 97,122               | 72,397                   |
|                       | MS_chip      | DEN      | 2,019          | 1,732           | 888/844/0            | 724/1,008/0   | 97,122               | 72,397                   |
| Finland               | Exome_v1.0   | FIN      | 558            | 535             | 535/0/0              | 153/382/0     | 74,570               | 48,724                   |
|                       | Exome_v1.0   | FIN      | 1,699          | 1,249           | 0/1249/0             | 540/709/0     | 74,570               | 48,724                   |
| France                | Exome_v1.0   | FRA      | 624            | 539             | 371/168/0            | 184/355/0     | 80,502               | 53,909                   |
| Germany               | Exome_v1.0   | GER      | 10,190         | 10,190          | 4,476/5,714          | N/A           | N/A                  | N/A                      |
| Greece                | MS_chip      | GRE      | 195            | 169             | 91/78/0              | 58/111/0      | 56,384               | 29,567                   |
| Italy                 | Exome_v1.0   | ITA      | 964            | 799             | 798/1/0              | 303/496/0     | 118,504              | 93,746                   |
|                       | Exome_v1.1   | ITA      | 939            | 805             | 0/805/0              | 559/246/0     | 118,504              | 93,746                   |
| Netherlands           | MS_chip      | ITA      | 1,956          | 1,507           | 732/775/0            | 726/781/0     | 118,504              | 93,746                   |
|                       | Exome_v1.0   | NED      | 504            | 400             | 400/0/0              | 115/285/0     | 127,220              | 102,830                  |
|                       | Exome_v1.1   | NED      | 2,181          | 1,805           | 0/1,805/0            | 810/995/0     | 127,220              | 102,830                  |
|                       | Exome_v1.0   | NED      | 218            | 176             | 176/0/0              | 65/111/0      | 127,220              | 102,830                  |
| Norway                | Exome_v1.0   | NOR      | 891            | 839             | 648/191/0            | 249/590/0     | 82,749               | 57,846                   |
|                       | Exome_v1.0   | NOR      | 342            | 317             | 0/317/0              | 163/154/0     | 82,749               | 57,846                   |
|                       | MS_chip      | NED-NOR  | 533            | 139             | 139/0/0              | 37/102/0      | 82,749               | 57,846                   |
| Sweden                | Exome_v1.0   | SWE      | 1,139          | 968             | 509/459/0            | 263/705/0     | 127,220              | 102,830                  |
|                       | MS_chip      | SWE      | 3,030          | 1,972           | 1,099/873/0          | 494/1,478/0   | 127,220              | 102,830                  |
|                       | MS_chip      | SWE      | 2,993          | 2,000           | 1,147/853/0          | 498/1,502/0   | 127,220              | 102,830                  |
|                       | MS_chip      | SWE      | 3,151          | 2,081           | 1,164/917/0          | 541/1,540/0   | 127,220              | 102,830                  |
|                       | MS_chip      | SWE      | 3,067          | 2,059           | 1,192/867/0          | 488/1,571/0   | 127,220              | 102,830                  |
|                       | MS_chip      | SWE      | 3,061          | 2,023           | 1,099/924/0          | 507/1,516/0   | 127,220              | 102,830                  |
|                       | MS_chip      | SWE      | 1,235          | 966             | 363/603/0            | 258/708/0     | 127,220              | 102,830                  |
| UK/Australia          | Exome_v1.0   | AUS      | 1,776          | 1,408           | 1,408/0/0            | 333/1,075/0   | 141,707              | 119,407                  |
|                       | Exome_v1.0   | AUS      | 333            | 172             | 172/0/0              | 31/141/0      | 141,707              | 119,407                  |
|                       | Exome_v1.0   | UK       | 6,400          | 5,316           | 0/5316/0             | 2,934/2,382/0 | 141,707              | 119,407                  |
|                       | Exome_v1.0   | UK       | 1,700          | 1,449           | 1,449/0/0            | 428/1,021/0   | 141,707              | 119,407                  |
|                       | Exome_v1.0   | UK       | 126            | 111             | 111/0/0              | 37/74/0       | 141,707              | 119,407                  |
|                       | Exome_v1.0   | UK       | 1,038          | 861             | 0/861/0              | 493/368/0     | 141,707              | 119,407                  |
|                       | Exome_v1.0   | UK       | 156            | 140             | 140/0/0              | 37/103/0      | 141,707              | 119,407                  |
|                       | MS_chip      | AUS      | 1,060          | 741             | 416/325/0            | 181/560/0     | 141,707              | 119,407                  |
|                       | MS_chip      | UK       | 2,666          | 1,992           | 956/1,036/0          | 700/1,292/0   | 141,707              | 119,407                  |
|                       | MS_chip      | UK       | 4,400          | 3,552           | 1,699/1,853/0        | 618/2,934/0   | 141,707              | 119,407                  |
|                       | MS_chip      | UK       | 1,886          | 1,616           | 747/869/0            | 385/1,231/0   | 141,707              | 119,407                  |
|                       | MS_chip      | UK       | 3,036          | 2,565           | 1,186/1,379/0        | 934/1,631/0   | 141,707              | 119,407                  |
| US-BSTN               | Exome_v1.0   | US       | 2,442          | 2,065           | 1,102/963/0          | 554/1,511/0   | 150,886              | 126,830                  |
|                       | Exome_v1.0   | US       | 129            | 87              | 87/0/0               | 23/64/0       | 150,886              | 126,830                  |
|                       | MS_chip      | US       | 4,542          | 3,486           | 1,847/1,639/0        | 1,026/2,460/0 | 150,886              | 126,830                  |
|                       | MS_chip      | US       | 3,510          | 2,330           | 1,215/1,115/0        | 741/1,589/0   | 150,886              | 126,830                  |
|                       | MS_chip      | US       | 3,032          | 2,391           | 1,333/1,058/0        | 699/1,692/0   | 150,886              | 126,830                  |
| US-UCSF1              | Exome_v1.0   | US       | 1,169          | 940             | 558/382/0            | 300/640/0     | 128,704              | 102,898                  |
|                       | Exome_v1.0   | US       | 1,971          | 1,792           | 1,019/773/0          | 287/1,505/0   | 128,704              | 102,898                  |
| US-UCSF2 <sup>a</sup> | Exome_v1.0   | US       | 1,670          | 580             | 330/250/0            | 212/368/0     | 128,704              | 102,898                  |
|                       | /            | /        | /              | /               | /                    | /             | 53,363               | 27,257                   |
| <b>Total</b>          | <b>/</b>     | <b>/</b> | <b>76,140</b>  | <b>68,379</b>   | <b>32,367/36,012</b> | <b>N/A</b>    | <b>/</b>             | <b>/</b>                 |

<sup>a</sup>Strata US-UCSF1 and US-UCSF2 consist of individuals from the same three US cohorts.

**Table S1 – genotype-level samples included in our study.** 58,189/76,140 (76.5%) of our samples passed quality control and could be assigned to one of thirteen strata. 9,473/17,951 (52.8%) of failed samples did not pass a heterogeneity versus missing data rate filter, suggesting either poor data quality or population stratification (detailed in Figure S1). We used two versions of Illumina’s HumanCore Exome array: the standard product (version 1.0; designated *Exome\_v1.x* in the chip type column) and a customized version including ~100,000 additional variants we specified (designated *MS\_chip*), described elsewhere (Patsopoulos et al., 2017). Belgian control samples were genotyped at the Center for Inherited Disease Research (CIDR, Baltimore, MD, USA) on the Illumina 5M array (Illumina, San Diego, CA, USA) as part of the Stroke Genetics Network (SiGN). Data for

10,190 samples from Germany were received as post-QC summary statistics and are not included in Table S1. This gave us a total of 68,379 samples in our analysis. We had very few Australian control samples and so merged them with samples from the UK.

| Gene                              | <i>GALC</i>   | <i>TYK2</i>   | <i>PRF1</i>   | <i>PRKRA</i>  | <i>PRKRA</i> | <i>NLRP8</i> | <i>HDAC7</i> |
|-----------------------------------|---------------|---------------|---------------|---------------|--------------|--------------|--------------|
| Exome chip significant variants   | rs11552556    | rs34536443    | rs35947132    | rs61999302    | rs62176112   | rs61734100   | rs148755202  |
| Chr                               | 14            | 19            | 10            | 2             | 2            | 19           | 12           |
| Position                          | 88,452,945    | 10,463,118    | 72,360,387    | 179,315,031   | 179,315,726  | 56,487,619   | 48,191,247   |
| Closest replicated IMSGC GWAS hit | rs116899835   | rs34536443    | rs17741873    | rs6738544     | rs6738544    | rs1465697    | rs701006     |
| r2                                | 0.841         | 1             | 0.003         | 0             | 0            | na           | na           |
| D'                                | 0.943         | 1             | 0.133         | 0.061         | 0.005        | na           | na           |
| Distance (bp)                     | 395,801       | 0             | 3,293,413     | 12,674,325    | 12,673,630   | 6,650,373    | 9,915,589    |
| GWAS cohort                       |               |               |               |               |              |              |              |
| ANZ                               | 0.8301        | 0.7688        | 0.1668        | 0.0154        | 0.0181       | na           | na           |
| AUS1                              | 0.7906        | 0.7498        | 0.2505        | 0.0313        | 0.0326       | na           | na           |
| BWH_MIGEN                         | 0.8127        | 0.1791        | 0.3835        | 0.0188        | 0.0233       | na           | na           |
| Berkeley                          | 0.867         | 0.774         | 0.3059        | 0.0241        | 0.0272       | na           | na           |
| CE1                               | 0.79          | 0.776         | 0.2899        | 0.036         | 0.0334       | na           | na           |
| FINLAND                           | 0.9376        | 0.7586        | 0.3775        | 0.0229        | 0.0228       | na           | na           |
| GeneMSA_DU                        | 0.8626        | 0.8481        | 0.4339        | 0.0192        | 0.0189       | na           | na           |
| GeneMSA_SW                        | 0.7705        | 0.7953        | 0.3058        | 0.0289        | 0.026        | na           | na           |
| GeneMSA_US                        | 0.8064        | 0.7121        | 0.3742        | 0.0192        | 0.0197       | na           | na           |
| IMSGC                             | 0.7428        | 0.1241        | 0.2075        | 0.0147        | 0.0196       | na           | na           |
| MEDI7                             | 0.7513        | 0.7304        | 0.4008        | 0.0227        | 0.0206       | na           | na           |
| UK                                | 0.8041        | 0.7796        | 0.2684        | 0.0347        | 0.0341       | na           | na           |
| US2                               | 0.802         | 0.7444        | 0.2834        | 0.0363        | 0.0365       | na           | na           |
| VIKINGS                           | 0.8424        | 0.7933        | 0.398         | 0.0254        | 0.0263       | na           | na           |
| Rotterdam                         | 0.8024        | 0.8093        | 0.2137        | 0.0237        | 0.0278       | na           | na           |
| <b>Median</b>                     | <b>0.8041</b> | <b>0.7688</b> | <b>0.3058</b> | <b>0.0237</b> | <b>0.026</b> | <b>na</b>    | <b>na</b>    |
| Minimum                           | 0.7428        | 0.1241        | 0.1668        | 0.0147        | 0.0181       | na           | na           |
| Maximum                           | 0.9376        | 0.8481        | 0.4339        | 0.0363        | 0.0365       | na           | na           |

**Table S2 – Five of seven exome-wide significant variants show no linkage disequilibrium with common MS risk variants and cannot be imputed from common variants.** To establish if our low-frequency variants are capturing common variant associations, we identified the closest common variant signal in our latest GWAS of 14,802 MS cases and 26,703 controls (IMSGC, 2017). As expected, the variants in *GALC* and *TYK2* capture previously known associations. The other five variants are >1Mb from the closest signal and show negligible LD levels to common MS risk variants. These thus represent novel associations and cannot be capturing common variant signals. We have previously imputed ~8.6 million 1000 Genomes variants in 14,802 MS cases and 26,703 controls from our GWAS, none of which overlap the samples presented in this study (IMSGC, 2017). In these samples, we are able to impute the *GALC* and *TYK2* variants with some certainty but cannot do so for the five remaining variants. These thus represent novel associations and cannot be capturing common variant signals. The association patterns in each locus shown graphically in Figures S5-S11.

| P-value threshold for selecting variants | MAF range   | Stratum      | Number of variants | Effect direction |          |            |
|------------------------------------------|-------------|--------------|--------------------|------------------|----------|------------|
|                                          |             |              |                    | OR > 1           | OR < 1   | Binomial p |
| [1,0]                                    | [1,0.05)    | Sweden       | 22,398             | 11,404           | 10,994   | 0.006      |
|                                          |             | UK/Australia | 20,515             | 10,355           | 10,160   | 0.176      |
|                                          |             | US-BSTN      | 22,026             | 11,203           | 10,823   | 0.011      |
|                                          | [0.05,0.01) | Sweden       | 8,464              | 4,252            | 4,212    | 0.672      |
|                                          |             | UK/Australia | 7,534              | 3,853            | 3,681    | 0.049      |
|                                          |             | US-BSTN      | 7,970              | 4,015            | 3,955    | 0.509      |
|                                          | [0.01,0]    | Sweden       | 84,526             | 42,514           | 42,012   | 0.085      |
| UK/Australia                             |             | 90,687       | 46,062             | 44,625           | 1.86E-06 |            |
|                                          |             | US-BSTN      | 108,763            | 56,719           | 52,044   | 1.31E-45   |
| [0.05,0]                                 | [1,0.05)    | Sweden       | 1,234              | 615              | 619      | 0.932      |
|                                          |             | UK/Australia | 1,185              | 616              | 569      | 0.181      |
|                                          |             | US-BSTN      | 1,296              | 628              | 668      | 0.279      |
|                                          | [0.05,0.01) | Sweden       | 460                | 243              | 217      | 0.244      |
|                                          |             | UK/Australia | 412                | 223              | 189      | 0.104      |
|                                          |             | US-BSTN      | 464                | 226              | 238      | 0.610      |
|                                          | [0.01,0]    | Sweden       | 2,654              | 1,333            | 1,321    | 0.831      |
| UK/Australia                             |             | 2,674        | 1,378              | 1,296            | 0.117    |            |
|                                          |             | US-BSTN      | 3,449              | 1,702            | 1,747    | 0.454      |
| [1E-4,0]                                 | [1,0.05)    | Sweden       | 21                 | 10               | 11       | 1          |
|                                          |             | UK/Australia | 34                 | 15               | 19       | 0.608      |
|                                          |             | US-BSTN      | 14                 | 4                | 10       | 0.180      |
|                                          | [0.05,0.01) | Sweden       | 0                  | -                | -        | na         |
|                                          |             | UK/Australia | 2                  | 1                | 1        | 1          |
|                                          |             | US-BSTN      | 2                  | 1                | 1        | 1          |
|                                          | [0.01,0]    | Sweden       | 3                  | 3                | -        | 0.250      |
| UK/Australia                             |             | 3            | 3                  | -                | 0.250    |            |
|                                          |             | US-BSTN      | 1                  | -                | 1        | 1          |
| [1E-6, 0]                                | [1,0.05)    | Sweden       | 5                  | 3                | 2        | 1          |
|                                          |             | UK/Australia | 5                  | -                | 5        | 0.063      |
|                                          |             | US-BSTN      | 0                  | -                | -        | na         |
|                                          | [0.05,0.01) | Sweden       | 0                  | -                | -        | na         |
|                                          |             | UK/Australia | 1                  | 1                | -        | 1          |
|                                          |             | US-BSTN      | 0                  | -                | -        | na         |
|                                          | [0.01,0]    | Sweden       | 0                  | -                | -        | na         |
| UK/Australia                             |             | 0            | -                  | -                | na       |            |
|                                          |             | US-BSTN      | 0                  | -                | -        | na         |

**Table S3 – downsampling to an equal number of cases and controls balances out the occurrence of risk and protective effects in low-frequency and rare variants.** We were struck by the observation that the minor allele is protective in six of the seven cases in Table 1, a trend we also observe at less stringent significant thresholds (Figure S3). To test if this phenomenon is due to our strata containing more cases than controls, we randomly resampled 4,000 affected and 4,000 unaffected samples in our three largest strata and calculated association statistics as for our main analysis. In this symmetric design, we found no bias towards protective minor alleles at even modest levels of significance.

| Stratum      | Number of cases | Number of controls | Number of SNPs in heritability calculations |                                   |                    |                             |
|--------------|-----------------|--------------------|---------------------------------------------|-----------------------------------|--------------------|-----------------------------|
|              |                 |                    | Common<br>MAF > 0.05                        | Intermediate<br>0.05 > MAF > 0.01 | Rare<br>MAF < 0.01 | Low-frequency<br>MAF < 0.05 |
| Belgium      | 386             | 356                | 16,059                                      | 8,763                             | 42,088             | 50,851                      |
| Denmark      | 1,267           | 1,238              | 16,059                                      | 8,298                             | 61,425             | 69,723                      |
| Finland      | 535             | 1,249              | 16,059                                      | 9,535                             | 37,192             | 46,727                      |
| France       | 371             | 168                | 16,059                                      | 9,103                             | 42,778             | 51,881                      |
| Greece       | 91              | 78                 | 16,059                                      | 8,640                             | 19,516             | 28,156                      |
| Italy        | 1,530           | 1,581              | 16,059                                      | 7,802                             | 82,841             | 90,643                      |
| Netherlands  | 576             | 1,805              | 16,059                                      | 8,494                             | 61,699             | 70,193                      |
| Norway       | 787             | 508                | 16,059                                      | 8,641                             | 47,025             | 55,666                      |
| Sweden       | 6,573           | 5,496              | 16,059                                      | 8,308                             | 90,833             | 99,141                      |
| UK/Australia | 8,284           | 11,639             | 16,059                                      | 7,388                             | 108,050            | 115,438                     |
| US-BSTN      | 5,584           | 4,775              | 16,059                                      | 7,780                             | 114,642            | 122,422                     |
| US-UCSF1     | 1,815           | 1,330              | 16,059                                      | 8,463                             | 90,929             | 99,392                      |
| US-UCSF2     | 92              | 75                 | 16,059                                      | 9,958                             | 15,962             | 25,920                      |

**Table S4 – Number of variants in heritability calculations for each MAF category.** In each of the thirteen strata that comprise our data, we estimated the proportion of heritability explained by common, low-frequency and rare variants. We calculated MAF in each stratum independently. Note that, as expected, we see more rare variants in larger strata.

**Table S5 – Imputation quality of 186 most significant GWAS variants** (*Table S5 is saved separately in the file “Imputation quality of 186 most significant GWAS variants.xlsx”*). We used our scaffold of 16,066 common, independent variants to impute each of the 200 common MS risk variants reported in our latest GWAS (Patsopoulos *et al*, 2017), in each of our three largest cohorts. We can impute 162, 156, and 162 variants in Sweden, UK/Australia and USA-Boston with an INFO score  $\geq 0.25$ ; these numbers drop to 72, 67, and 75 of 200 at INFO  $\geq 0.5$  and 22, 20, and 20 at INFO  $\geq 0.75$ , respectively.
